# Supplementary material for: A simple lateral flow biosensor for the rapid detection of copper(ii) ions based on click chemistry
Source: Royal Society of Chemistry journal article supplement (doi:10.1039/c5ra11752f), 2015-01-01
Supplement: c5ra11752f1.pdf [file c5ra11752f1.pdf]

## **Supplementary Information**

### **A Simple Lateral Flow Biosensor for the Rapid Detection of Copper (II) Ion Based on Click Chemistry**

Dou Wang, Chenchen Ge, Lin Wang, Xuerong Xing\* and Lingwen Zeng\*

Key Laboratory of Regenerative Biology, South China Institute for Stem Cell Biology  
and Regenerative Medicine, Guangzhou Institutes of Biomedicine and Health,  
Chinese Academy of Sciences, Guangzhou, 510530, China.

**\* Correspondence:**

***Lingwen Zeng, Ph. D***

E-mail: zeng6@yahoo.com; Fax: +86 20 32015245; Tel: +86 20 32015312  
190 Kaiyuan Road, Guangzhou Science Park, Guangzhou, 510530, China

***Xuerong Xing, Ph. D***

E-mail: xing\_xr@tib.cas.cn.  
Tianjin Institute of Industrial Biotechnology, University of Chinese Academy of  
Sciences, Tianjin, 300308, China.

**Table S1** Sequences of the DNA used in this study

| Name              | Sequence (5'→3')                     |
|-------------------|--------------------------------------|
| Azide-DNA         | ATACTCCCCCAGGTGCCG                   |
| Alkyne/biotin-DNA | AGCTTCTTTCTAATACG                    |
| Control zone-DNA  | CGTATTAGAAAGAAGCTCGTATTAGAAAGAAGCT   |
| Test zone-DNA     | CGGCACCTGGGGGAGTATCGGCACCTGGGGGAGTAT |

**Table S2** Measurements of Cu<sup>2+</sup> spiked in tap water and human serum

| Samples     | Cu <sup>2+</sup> (μM) (n=3) |              | Recovery (%) |
|-------------|-----------------------------|--------------|--------------|
|             | spiked                      | detected     |              |
| Tap water   | 2                           | 1.92 ± 0.09  | 91.3%        |
|             | 20                          | 22.8 ± 0.79  | 109.3%       |
|             | 200                         | 190.4 ± 1.92 | 95.2%        |
| Human serum | 2                           | 1.91 ± 0.12  | 95.5%        |
|             | 20                          | 19.2 ± 1.09  | 96%          |
|             | 200                         | 208.4 ± 1.92 | 104.2%       |

**Table S3** Assessment of repeatability and reproducibility of the biosensor

| researcher | optical intensity |     |     |     |     | CV    |
|------------|-------------------|-----|-----|-----|-----|-------|
| 1          | 924               | 830 | 832 | 917 | 869 | 4.06% |
|            | 895               | 827 | 842 | 859 | 912 |       |
|            | 920               | 816 | 832 | 891 | 870 |       |
| 2          | 830               | 920 | 811 | 870 | 845 | 4.38% |
|            | 823               | 831 | 865 | 841 | 851 |       |
|            | 921               | 890 | 845 | 835 | 824 |       |
| CV         | 4.23%             |     |     |     |     |       |

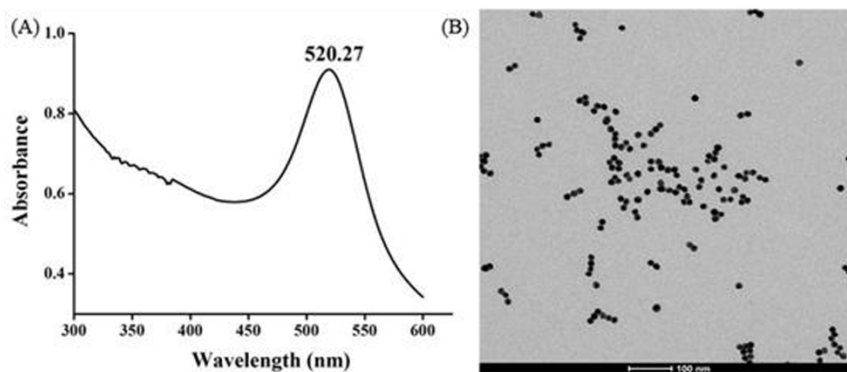

**Fig. S1** (A) The UV absorption spectrum and (B) TEM photographs of AuNPs used in the experiment. Scale bars are 100 nm.

|                               | 1  | 2   | 3   | 4   | 5   | 6   | 7   | 8  | 9  |
|-------------------------------|----|-----|-----|-----|-----|-----|-----|----|----|
| Azide                         | 2  | 2   | 2   | 2   | 2   | 2   | 2   | 2  | 2  |
| DNA                           | uM | uM  | uM  | uM  | uM  | uM  | uM  | uM | uM |
| Cu <sup>2+</sup>              | 0  | 200 | 200 | 200 | 200 | 200 | 0   | 0  | 0  |
|                               |    | uM  | uM  | uM  | uM  | uM  |     |    |    |
| VC                            | 0  | 500 | 500 | 500 | 500 | 500 | 0   | 0  | 0  |
|                               |    | uM  | uM  | uM  | uM  | uM  |     |    |    |
| H <sub>2</sub> O <sub>2</sub> | 0  | 0   | 200 | 500 | 1   | 2   | 500 | 1  | 2  |
|                               |    |     | uM  | uM  | mM  | mM  | uM  | mM | mM |

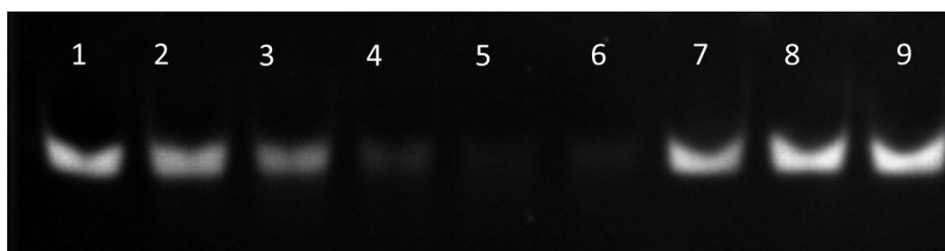

**Fig. S2** PAGE of the azide-DNA under different concentrations of Cu<sup>2+</sup>, sodium ascorbate and H<sub>2</sub>O<sub>2</sub> and ligation product. We designed an experiment to measure the DNA scission. We treated the azide-DNA with different concentrations of Cu<sup>2+</sup>, sodium ascorbate and H<sub>2</sub>O<sub>2</sub> and ran on PAGE. When only 200μM Cu<sup>2+</sup>/500μM sodium ascorbate were added to 2μM azide-DNA, no extensive DNA degradation occurred, the same thing happen when only H<sub>2</sub>O<sub>2</sub> was added even at a high concentration of 2 mM. But when 200μM Cu<sup>2+</sup>/500μM sodium ascorbate was mixed with different concentrations of H<sub>2</sub>O<sub>2</sub>, DNA degradation occurred, and with the increase of H<sub>2</sub>O<sub>2</sub>, DNA degradation increased. In our method, no extra H<sub>2</sub>O<sub>2</sub> was added, so there was not so much H<sub>2</sub>O<sub>2</sub> produced by the reaction of ascorbate acid and Cu<sup>2+</sup>. Therefore no extensive DNA degradation occurred.

|                               | <b>1</b> | <b>2</b> | <b>3</b> |
|-------------------------------|----------|----------|----------|
| Alkyne                        | 2        | 2        | 2        |
| DNA                           | uM       | uM       | uM       |
| Cu <sup>2+</sup>              | 0        | 200      | 200      |
|                               |          | uM       | uM       |
| VC                            | 0        | 500      | 500      |
|                               |          | uM       | uM       |
| H <sub>2</sub> O <sub>2</sub> | 0        | 0        | 500      |
|                               |          |          | uM       |

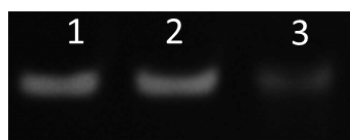

**Fig. S3** PAGE of the alkyne-DNA under different concentrations of Cu<sup>2+</sup>, sodium ascorbate and H<sub>2</sub>O<sub>2</sub>.
